# Supplementary material for: Breaking Barriers to Healthcare Access: A Multilevel Analysis of Individual- and Community-Level Factors Affecting Women’s Access to Healthcare Services in Benin
Source: MDPI journal article supplement (doi:10.3390/ijerph18020750), 2021-01-17
Supplement: s1 [file s1]

**Supplementary material 1. Frequency distribution of study participants in health care access: Evidence from 2017-2018 Benin demographic and health survey.**

| <b>Characteristics</b>            | <b>N</b> | <b>(%)</b> |
|-----------------------------------|----------|------------|
| <b>Age (years)</b>                |          |            |
| 15-19                             | 3,335    | (20.94%)   |
| 20-24                             | 2,916    | (18.31%)   |
| 25-29                             | 2,971    | (18.65%)   |
| 30-34                             | 2,195    | (13.78%)   |
| 35-39                             | 1,905    | (11.96%)   |
| 40-44                             | 1,333    | (8.37%)    |
| 45-49                             | 1,273    | (7.99%)    |
| <b>Women's educational status</b> |          |            |
| No education                      | 8,762    | (55.01%)   |
| Primary                           | 3,116    | (19.56%)   |
| Secondary                         | 3,685    | (23.14%)   |
| Higher                            | 365      | (2.29%)    |
| <b>Husband educational status</b> |          |            |
| No formal education               | 6,321    | (56.59%)   |
| Primary school                    | 2,130    | (19.07%)   |
| Secondary school                  | 2,063    | (18.47%)   |
| Higher                            | 656      | (5.87%)    |
| <b>Women occupation</b>           |          |            |
| Not working                       | 3,527    | (22.14%)   |
| Professional/technical/managerial | 543      | (3.41%)    |
| Sales                             | 4,537    | (28.48%)   |
| Agricultural - self employed      | 2,574    | (16.16%)   |
| Agricultural - employee           | 491      | (3.08%)    |
| Services                          | 1,842    | (11.56%)   |
| Skilled manual                    | 1,825    | (11.46%)   |
| Other unclassified                | 589      | (3.70%)    |
| <b>Husband occupation</b>         |          |            |
| Not working                       | 5,040    | (31.64%)   |
| Professional/technical/managerial | 1,491    | (9.36%)    |
| Sales                             | 1,007    | (6.32%)    |
| Agricultural - self employed      | 4,493    | (28.21%)   |
| Agricultural - employee           | 322      | (2.02%)    |

|                         |       |          |
|-------------------------|-------|----------|
| Services                | 1,385 | (8.70%)  |
| Skilled manual          | 1,820 | (11.43%) |
| Other unclassified      | 370   | (2.32%)  |
| <b>Religion</b>         |       |          |
| Vodoun                  | 1,332 | (8.36%)  |
| Islam                   | 4,677 | (29.36%) |
| Catholic                | 3,945 | (24.77%) |
| Protestant Methodist    | 786   | (4.93%)  |
| Other protestants       | 610   | (3.83%)  |
| Celestes                | 1,238 | (7.77%)  |
| Other Christians        | 2,205 | (13.84%) |
| Other religions         | 302   | (1.90%)  |
| No religion             | 833   | (5.23%)  |
| <b>Wealth quintiles</b> |       |          |
| Poorest                 | 2,856 | (17.93%) |
| Poorer                  | 2,976 | (18.68%) |
| Middle                  | 2,985 | (18.74%) |
| Richer                  | 3,281 | (20.60%) |
| Richest                 | 3,830 | (24.05%) |
| <b>Ethnicity</b>        |       |          |
| Adja and related        | 2,174 | (13.65%) |
| Bariba and related.     | 1,729 | (10.86%) |
| Dendi and related.      | 838   | (5.26%)  |
| Fon and related.        | 5,745 | (36.07%) |
| Yoa, lokpa and relate   | 441   | (2.77%)  |
| Betamaribe and relate   | 1,065 | (6.69%)  |
| Peulh and related       | 1,243 | (7.80%)  |
| Yoruba and related.     | 1,936 | (12.15%) |
| Other beninois          | 533   | (3.35%)  |
| Other nationalities     | 224   | (1.41%)  |
| <b>Marital status</b>   |       |          |
| Not currently married   | 7,100 | (44.58%) |
| Married                 | 8,828 | (55.42%) |
| <b>Parity</b>           |       |          |
| No                      | 4,172 | (26.19%) |

|                                      |       |          |
|--------------------------------------|-------|----------|
| 1-2                                  | 3,995 | (25.08%) |
| 3-4                                  | 3,568 | (22.40%) |
| ≥5                                   | 4,193 | (26.32%) |
| <b>Place of residence</b>            |       |          |
| Urban                                | 7,045 | (44.23%) |
| Rural                                | 8,883 | (55.77%) |
| <b>Region</b>                        |       |          |
| Alibori                              | 1,697 | (10.65%) |
| Atacora                              | 1,392 | (8.74%)  |
| Atlantic                             | 1,702 | (10.69%) |
| Borgou                               | 1,765 | (11.08%) |
| Collines                             | 1,403 | (8.81%)  |
| Couffo                               | 1,012 | (6.35%)  |
| Donga                                | 964   | (6.05%)  |
| Littoral                             | 1,415 | (8.88%)  |
| Mono                                 | 816   | (5.12%)  |
| Oueme                                | 1,260 | (7.91%)  |
| Plateau                              | 952   | (5.98%)  |
| Zou                                  | 1,550 | (9.73%)  |
| <b>Community literacy level</b>      |       |          |
| Low                                  | 5,343 | (33.54%) |
| Medium                               | 5,344 | (33.55%) |
| High                                 | 5,241 | (32.90%) |
| <b>Community socioeconomic level</b> |       |          |
| Low                                  | 6,724 | (42.21%) |
| Moderate                             | 3,916 | (24.59%) |
| High                                 | 5,288 | (33.20%) |

**Supplementary material 2- Magnitude of health care access problem across explanatory variables among reproductive women: Evidence from 2017/18 Benin demographic and health survey.**

| Characteristics                     | Health care access problem | Chi-square, p-value         |
|-------------------------------------|----------------------------|-----------------------------|
| <b>Age (years)</b>                  | N (%)                      |                             |
| 15-19                               | 1,941 (58.20%)             |                             |
| 20-24                               | 1,740 (59.67%)             |                             |
| 25-29                               | 1,781 (59.95%)             |                             |
| 30-34                               | 1,320 (60.14%)             |                             |
| 35-39                               | 1,140 (59.84%)             |                             |
| 40-44                               | 851 (63.84%)               |                             |
| 45-49                               | 809 (63.55%)               | $\chi^2=19.41$ , $p<0.01$   |
| <b>Women's educational status</b>   |                            |                             |
| No formal education                 | 5,632 (64.28%)             |                             |
| Primary school                      | 1,900 (60.98%)             |                             |
| Secondary school                    | 1,917 (40.6%)              |                             |
| Higher                              | 133 (36.44%)               | $\chi^2=250.36$ , $p<0.001$ |
| <b>Husband's educational status</b> |                            |                             |
| No formal education                 | 3,991 (63.14%)             |                             |
| Primary school                      | 1,376 (64.60%)             |                             |
| Secondary school                    | 1,133 (54.92%)             |                             |

|                                   |                |                             |
|-----------------------------------|----------------|-----------------------------|
| Higher                            | 243 (37.04%)   | $\chi^2=211.00$ , $p<0.001$ |
| <b>Women's occupation</b>         |                |                             |
| Not working                       | 1,837 (52.08%) |                             |
| Professional/technical/managerial | 221 (40.70%)   |                             |
| Sales                             | 2,791 (61.52%) |                             |
| Agricultural - self employed      | 1,859 (72.22%) |                             |
| Agricultural – employee           | 258 (52.55%)   |                             |
| Services                          | 1,168 (63.41%) |                             |
| Skilled manual                    | 1,098 (60.16%) |                             |
| Other unclassified                | 350 (59.42%)   | $\chi^2=361.63$ , $p<0.001$ |
| <b>Husband's occupation</b>       |                |                             |
| Not working                       | 2,988 (59.29%) |                             |
| Professional/technical/managerial | 722 (48.42%)   |                             |
| Sales                             | 570 (56.60%)   |                             |
| Agricultural - self employed      | 2,995 (66.66%) |                             |
| Agricultural – employee           | 182 (56.52%)   |                             |
| Services                          | 816 (58.92%)   |                             |
| Skilled manual                    | 1,103 (60.60%) |                             |
| Other unclassified                | 206 (55.68%)   | $\chi^2=177.71$ , $p<0.001$ |
| <b>Religion</b>                   |                |                             |

|                         |                |                             |
|-------------------------|----------------|-----------------------------|
| Vodoun                  | 914 (68.62%)   |                             |
| Islam                   | 2,579 (55.14%) |                             |
| Catholic                | 2,269 (57.52%) |                             |
| Protestant Methodist    | 461 (58.65%)   |                             |
| Other protestants       | 393 (64.43%)   |                             |
| Celestes                | 857 (69.22%)   |                             |
| Other Christians        | 1,330 (60.32%) |                             |
| Other religions         | 174 (57.62%)   |                             |
| No religion             | 605 (72.63%)   | $\chi^2=203.09$ , $p<0.001$ |
| <b>Wealth quintiles</b> |                |                             |
| Poorest                 | 2,023 (70.83%) |                             |
| Poorer                  | 1,940 (65.19%) |                             |
| Middle                  | 1,880 (62.98%) |                             |
| Richer                  | 1,940 (59.13%) |                             |
| Richest                 | 1,799 (46.97%) | $\chi^2=456.46$ , $p<0.001$ |
| <b>Ethnicity</b>        |                |                             |
| Adja and related        | 1,314 (60.44%) |                             |
| Bariba and related      | 856 (49.51%)   |                             |
| Dendi and related       | 406 (48.45%)   |                             |
| Fon and related         | 3,539 (61.60%) |                             |

|                           |                |                             |
|---------------------------|----------------|-----------------------------|
| Yoa, lokpa and related    | 246 (55.78%)   |                             |
| Betamaribe and related    | 810 (76.06%)   |                             |
| Peulh and related         | 858 (69.03%)   |                             |
| Yoruba and related        | 1,145 (59.14%) |                             |
| Other beninois            | 311 (58.35%)   |                             |
| Other nationalities       | 97 (43.30%)    | $\chi^2=319.54$ , $p<0.001$ |
| <b>Marital status</b>     |                |                             |
| Not currently married     | 4,421 (62.27%) |                             |
| Married                   | 5,161 (58.46%) | $\chi^2=23.78$ , $p<0.001$  |
| <b>Parity</b>             |                |                             |
| No                        | 2,332 (55.90%) |                             |
| 1-2                       | 2,292 (57.37%) |                             |
| 3-4                       | 2,184 (61.21%) |                             |
| $\geq 5$                  | 2,774 (66.16%) | $\chi^2=109.17$ , $p<0.001$ |
| <b>Place of residence</b> |                |                             |
| Urban                     | 3,950 (56.07%) |                             |
| Rural                     | 5,632 (63.40%) | $\chi^2=88.16$ , $p<0.001$  |
| <b>Region</b>             |                |                             |
| Alibori                   | 824 (48.56%)   |                             |
| Atacora                   | 996 (71.55%)   |                             |

|                                      |                |                          |
|--------------------------------------|----------------|--------------------------|
| Atlantic                             | 1,138 (66.86%) |                          |
| Borgou                               | 1,123 (63.63%) |                          |
| Collines                             | 755 (53.81%)   |                          |
| Couffo                               | 532 (52.57%)   |                          |
| Donga                                | 476 (49.38%)   |                          |
| Littoral                             | 680 (48.06%)   |                          |
| Mono                                 | 610 (74.75%)   |                          |
| Oueme                                | 820 (65.08%)   |                          |
| Plateau                              | 727 (76.37%)   |                          |
| Zou                                  | 901 (58.13%)   | $\chi^2=584.82, p<0.001$ |
| <b>Community literacy level</b>      |                |                          |
| Low                                  | 3,595 (67.28%) |                          |
| Medium                               | 3,270 (61.19%) |                          |
| High                                 | 2,717 (51.84%) | $\chi^2=266.83, p<0.001$ |
| <b>Community socioeconomic level</b> |                |                          |
| Low                                  | 4,452 (66.21%) |                          |
| Moderate                             | 2,406 (61.44%) |                          |
| High                                 | 2,724 (51.51%) | $\chi^2=270.35, p<0.001$ |



**Supplementary Material 3. Multilevel multivariable logistic regression results for health care access problems and its associated factors among women in the reproductive age groups: Evidence from 2017/18 Benin demographic and health survey.**

| Characteristics                     | Model 0   | Model I            | Model II | Model III          |
|-------------------------------------|-----------|--------------------|----------|--------------------|
| <b>Age (years)</b>                  |           |                    |          |                    |
| 15-19                               | Reference |                    |          |                    |
| 20-24                               |           | 1.16 (0.93-1.44)   |          | 1.16 (0.93-1.44)   |
| 25-29                               |           | 0.95 (0.75-1.19)   |          | 0.95 (0.76-1.19)   |
| 30-34                               |           | 0.82 (0.64-1.06)   |          | 0.83 (0.65-1.06)   |
| 35-39                               |           | 0.78 (0.60-1.01)   |          | 0.79 (0.61-1.02)   |
| 40-44                               |           | 0.84 (0.64-1.11)   |          | 0.85 (0.65-1.12)   |
| 45-49                               |           | 0.81 (0.61-1.08)   |          | 0.83 (0.62-1.10)   |
| <b>Women's educational status</b>   |           |                    |          |                    |
| No formal education                 | Reference |                    |          |                    |
| Primary                             |           | 0.97 (0.85-1.11)   |          | 0.98 (0.86-1.12)   |
| Secondary                           |           | 0.88 (0.76-1.03)   |          | 0.91 (0.78-1.06)   |
| Higher                              |           | 0.73 (0.47-1.13)   |          | 0.76 (0.49-1.17)   |
| <b>Husband's educational status</b> |           |                    |          |                    |
| No formal education                 | Reference |                    |          |                    |
| Primary school                      |           | 1.12 (0.99-1.28)   |          | 1.11 (0.98-1.27)   |
| Secondary school                    |           | 0.93 (0.81-1.07)   |          | 0.94 (0.82-1.08)   |
| Higher                              |           | 0.70(0.55-0.89)**  |          | 0.70 (0.55-0.89)** |
| <b>Women's occupation</b>           |           |                    |          |                    |
| Not working                         | Reference |                    |          |                    |
| Professional/technical/managerial   |           | 0.92 (0.68-1.23)   |          | 0.91 (0.68-1.21)   |
| Sales                               |           | 1.16 (1.01-1.35)*  |          | 1.16 (1.00-1.34)*  |
| Agricultural-self employed          |           | 1.26 (1.06-1.50)** |          | 1.28 (1.08-1.53)** |

|                                   |           |                    |  |                     |
|-----------------------------------|-----------|--------------------|--|---------------------|
| Agricultural–employee             |           | 0.68(0.51-0.89)**  |  | 0.69 (0.52-0.91)**  |
| Services                          |           | 1.28(1.07-1.53)**  |  | 1.28 (1.07-1.52)**  |
| Skilled manual                    |           | 1.00 (0.83-1.19)   |  | 0.98 (0.82-1.18)    |
| Other unclassified                |           | 1.11 (0.78-1.59)   |  | 1.13 (0.79-1.61)    |
| <b>Husband occupation</b>         |           |                    |  |                     |
| Did not work                      | Reference |                    |  |                     |
| Professional/technical/managerial |           | 1.06 (0.78-1.44)   |  | 1.07 (0.79-1.45)    |
| Sales                             |           | 1.36 (1.00-1.86)*  |  | 1.39 (1.02-1.91)*   |
| Agricultural - self employed      |           | 1.48 (1.11-1.98)   |  | 1.48 (1.11-1.98)**  |
| Agricultural–employee             |           | 1.06 (0.72-1.57)   |  | 1.11 (0.75-1.64)    |
| Services                          |           | 1.29 (0.95-1.76)   |  | 1.31 (0.96-1.77)    |
| Skilled manual                    |           | 1.25 (0.93-1.69)   |  | 1.24 (0.92-1.68)    |
| Other unclassified                |           | 1.20 (0.83-1.73)   |  | 1.19 (0.83-1.71)    |
| <b>Religion</b>                   |           |                    |  |                     |
| Vodoun                            | Reference |                    |  |                     |
| Islam                             |           | 0.79 (0.62-1.01)   |  | 0.81 (0.63-1.03)    |
| Catholic                          |           | 0.86 (0.70-1.06)   |  | 0.86 (0.70-1.06)    |
| Protestant Methodist              |           | 1.04 (0.79-1.38)   |  | 1.02 (0.77-1.35)    |
| Other protestants                 |           | 1.08 (0.80-1.47)   |  | 1.03 (0.76-1.40)    |
| Celestes                          |           | 1.10 (0.86-1.40)   |  | 1.06 (0.83-1.35)    |
| Other christians                  |           | 0.80 (0.65-0.98)*  |  | 0.80 (0.65-0.98)*   |
| Other religions                   |           | 0.62 (0.43-0.89)*  |  | 0.58 (0.40-0.83)**  |
| No religion                       |           | 1.04 (0.80-1.36)   |  | 1.02 (0.78-1.33)    |
| <b>Wealth quintiles</b>           |           |                    |  |                     |
| Poorest                           | Reference |                    |  |                     |
| Poorer                            |           | 0.95 (0.81-1.11)   |  | 0.97 (0.83-1.13)    |
| Middle                            |           | 0.87 (0.73-1.02)   |  | 0.90 (0.77-1.07)    |
| Richer                            |           | 0.83(0.70-0.99)*   |  | 0.88 (0.74-1.06)    |
| Richest                           |           | 0.53(0.43-0.66)*** |  | 0.59 (0.47-0.73)*** |
| <b>Ethnicity</b>                  |           |                    |  |                     |

|                           |           |                    |                     |                     |
|---------------------------|-----------|--------------------|---------------------|---------------------|
| Adja and related          | Reference |                    |                     |                     |
| Bariba and related        |           | 0.82 (0.61-1.10)   |                     | 0.75 (0.52-1.07)    |
| Dendi and related         |           | 1.30 (0.92-1.83)   |                     | 1.31 (0.88-1.94)    |
| Fon and related           |           | 1.17 (0.96-1.44)   |                     | 1.00 (0.78-1.27)    |
| Yoa, lokpa and related    |           | 1.14 (0.77-1.69)   |                     | 1.14 (0.73-1.79)    |
| Betamaribe and related    |           | 1.64(1.16-2.32)**  |                     | 1.42 (0.93-2.15)    |
| Peulh and related         |           | 1.68(1.21-2.33)**  |                     | 1.40 (0.96-2.05)    |
| Yoruba and related        |           | 1.14 (0.87-1.48)   |                     | 0.89 (0.65-1.21)    |
| Other beninois            |           | 1.00 (0.69-1.44)   |                     | 1.02 (0.67-1.55)    |
| Other nationalities       |           | 0.75 (0.50-1.12)   |                     | 0.67 (0.44-1.03)    |
| <b>Marital status</b>     |           |                    |                     |                     |
| Not currently married     | Reference |                    |                     |                     |
| Married                   |           | 0.43(0.38-0.49)*** |                     | 0.44 (0.39-0.51)*** |
| <b>Parity</b>             |           |                    |                     |                     |
| No                        | Reference |                    |                     |                     |
| 1-2                       |           | 1.35(1.10-1.65)**  |                     | 1.34 (1.10-1.65)**  |
| 3-4                       |           | 1.73(1.38-2.16)*** |                     | 1.72 (1.37-2.14)*** |
| ≥5                        |           | 1.87(1.47-2.37)*** |                     | 1.85 (1.45-2.35)*** |
| <b>Place of residence</b> |           |                    |                     |                     |
| Urban                     | Reference |                    |                     |                     |
| Rural                     |           |                    | 0.98 ( 0.81-1.19)   | 1.02 (0.82-1.26)    |
| <b>Region</b>             |           |                    |                     |                     |
| Alibori                   | Reference |                    |                     |                     |
| Atacora                   |           |                    | 2.81(1.93-4.09)***  | 2.28 (1.44-3.59)*** |
| Atlantic                  |           |                    | 3.65 (2.56-5.20)*** | 2.97 (1.88-4.70)*** |
| Borgou                    |           |                    | 2.17 (1.54-3.07)*** | 2.60 (1.76-3.85)*** |
| Collines                  |           |                    | 1.58 (1.09-2.27)*   | 1.55 (0.98-2.45)    |
| Couffo                    |           |                    | 1.23 (0.85-1.79)    | 0.83 (0.50-1.40)    |

|                                      |                            |                           |                           |                           |
|--------------------------------------|----------------------------|---------------------------|---------------------------|---------------------------|
| Donga                                |                            |                           | 1.12 (0.75-1.66)          | 1.37 (0.86-2.17)          |
| Littoral                             |                            |                           | 2.31 (1.55-3.42)***       | 2.45 (1.50-4.00)***       |
| Mono                                 |                            |                           | 4.81 (3.19-7.25)***       | 4.12 (2.39-7.08)***       |
| Oueme                                |                            |                           | 3.56 (2.46-5.16)***       | 3.33 (2.07-5.35)***       |
| Plateau                              |                            |                           | 4.36 (2.94-6.46)***       | 5.24 (3.18-8.64)***       |
| Zou                                  |                            |                           | 2.038 (1.42-2.91)***      | 2.02 (1.27-3.23)**        |
| <b>Community literacy level</b>      |                            |                           |                           |                           |
| Low                                  | Reference                  |                           |                           |                           |
| Medium                               |                            |                           | 0.69 (0.56-0.86)**        | 0.72 (0.57-0.91)**        |
| High                                 |                            |                           | 0.54 (0.41-0.71)***       | 0.69 (0.51-0.94)*         |
| <b>Community socioeconomic level</b> |                            |                           |                           |                           |
| Low                                  | Reference                  |                           |                           |                           |
| Moderate                             |                            |                           | 0.84 (0.68-1.03)          | 0.97 (0.76-1.23)          |
| High                                 |                            |                           | 0.52 (0.40-0.69)***       | 0.80 (0.57-1.10)          |
| <b>Random effect result</b>          |                            |                           |                           |                           |
| PSU variance (95% CI)                | 0.94 (0.80-1.10)           | 0.91 (0.76-1.09)          | 0.57 (0.48-0.68)          | 0.67 (0.55-0.82)          |
| ICC                                  | 0.22                       | 0.21                      | 0.14                      | 0.17                      |
| LR Test, p-value                     | $\chi^2=1683.82$ , p<0.001 | $\chi^2=791.89$ , p<0.001 | $\chi^2=868.20$ , p<0.001 | $\chi^2=528.30$ , p<0.001 |
| Wald chi-square and p-value          | Reference                  | $\chi^2=522.75$           | $\chi^2=247.28$ , p<0.001 | $\chi^2=637.60$ , p<0.001 |
| <b>Model fitness</b>                 |                            |                           |                           |                           |
| Log-likelihood                       | -9867.52                   | -6639.58                  | -9762.03                  | -6579.99                  |
| AIC                                  | 19739.04                   | 13385.16                  | 19560.07                  | 13298                     |
| BIC                                  | 19754.39                   | 13773.18                  | 19698.23                  | 13803.14                  |
| PSU                                  | 555                        | 555                       | 555                       | 555                       |
| N                                    | 15,928                     | 11,170                    | 15,928                    | 11,170                    |

\* p<0.05, \*\* p<0.01, \*\*\* p<0.0001, ref: reference, AIC: Akaike Information Criterion, BIC: Bayesian Information Criterion.
